# Supplementary material
Source: publisher site journal article supplement (https://www.dovepress.com/article/359444)
Supplement: Supplementary file 1 [file get_supplementary_file.php]

ORIGINAL RESEARCH

Ogugu E. G. et al

# The Association Between Habitual Sleep Duration and Blood Pressure Control in United States (US) Adults with Hypertension

**Supplementary Information**

**Appendix Section 1: Missing data and multiple imputation**

The percentage of observations with complete data for all covariates was 85%. The covariates with missing data (unweighted number and weighted percentage) included education level (*n=6, 0.1%*)*,* annual household income (*n=413, 6.0%*), health insurance(*n=10, 0.2%*),alcohol intake (*n=333, 5.3%*)*,* BMI(*n=67, 1.0%*)*,* depressive symptoms(*n=357, 5.6%*),andhealthcare visits in past year(*n=10, 0.1%*). Missing data were imputed using multiple imputation with chained equations. A total of 20 imputation datasets were generated, and the results pooled to generate estimates of the multiply impute model using STATA’s multiple imputation (MI) estimate procedures. The variables used in the imputation model included all the variables in the analysis model, the NHANES cluster, strata, and weights variables, and auxiliary variables significantly associated with missingness of data in the covariates with missing data (age and education level of the reference person, homeownership, number of rooms in house of residence, and household size).

**Appendix Table 1**

**Comparative sensitivity analysis between pre-imputation and post-imputation data of variables with missing data**

| **Characteristic** | **Pre-imputation** | **Post-imputation** |
| --- | --- | --- |
| Education level, Weighted % (95% CI) |  |  |
| College graduate | 27.6 (23.8 – 31.4) | 27.6 (23.8 – 31.4) |
| Some college | 33.1 (30.6 – 35.8) | 33.1 (30.5 – 35.8) |
| High school graduate | 25.9 (23.6 – 28.3) | 25.9 (23.5 – 28.4) |
| Less than high school | 13.4 (11.6 – 15.3) | 13.4 (11.5 – 15.2) |
| Annual household income, Weighted % (95% CI) |  |  |
| < $55,000 | 48.5 (44.7 – 52.4) | 49.3 (45.5 – 53.1) |
| ≥ $55,000 | 51.5 (47.6 – 55.3) | 50.7 (47.0 – 54.5) |
| Has health insurance, Weighted % (95% CI) |  |  |
| Yes | 89.5 (86.9 – 91.6) | 89.4 (87.1 – 91.8) |
| No | 10.5 (8.4 – 13.1) | 10.6 (8.2 – 12.9) |
| Healthcare visits in the past year, Weighted % (95% CI) |  |  |
| 0 | 12.7 (11.3 – 14.4) | 12.7 (11.2 – 14.3) |
| 1 - 2 | 45.5 (43.3 – 47.7) | 45.5 (43.3 – 47.7) |
| >2 | 41.8 (39.7 – 43.9) | 41.8 (39.6 – 43.9) |
| Depressive symptoms severity, Weighted % (95% CI) |  |  |
| Minimal or none | 75.4 (73.6 – 77.1) | 75.4 (73.7 – 77.2) |
| Mild | 16.1 (14.7 – 17.7) | 16.1 (14.6 – 17.7) |
| Moderate to severe | 8.5 (7.4 – 9.7) | 8.4 (7.3 – 9.6) |
| Body mass index, Weighted mean (SE) | 31.2 (0.19) | 31.2 (0.19) |
| Alcohol intake, Weighted % (95% CI) |  |  |
| None | 28.5 (26.3 – 30.8) | 28.7 (26.5 – 30.9) |
| Moderate | 38.8 (36.0 – 41.6) | 38.6 (35.9 – 41.3) |
| Heavy | 32.7 (30.7 – 34.8) | 32.7 (30.7 – 34.8) |

Appendix Table 2

Comparison of results on **odds for BP control in NHANES sample of US adults with hypertension: All adults with hypertension**

|  | **Crude OR (95% CI)** | | **aOR (95% CI)** a | |
| --- | --- | --- | --- | --- |
|  | **Pre-imputation** | **Post-imputation** | **Pre-imputation** | **Post-imputation** |
| Sleep duration |  |  |  |  |
| 7 - 9 | 1 (Ref) | 1 (Ref) | 1 (Ref) | 1 (Ref) |
| <6 | 0.65 (0.44 – 0.98) | 0.65 (0.44 – 0.98) | 0.52 (0.35 – 0.77) | 0.53 (0.37 – 0.76) |
| 6 - <7 | 1.22 (0.81 – 1.82) | 1.22 (0.81 – 1.82) | 1.15 (0.71 – 1.88) | 1.23 (0.77 – 1.98) |
| >9 | 1.12 (0.81 – 1.55) | 1.12 (0.81 – 1.55) | 0.98 (0.66 – 1.46) | 0.93 (0.64 – 1.36) |
| Age |  |  |  |  |
| 18-39 | 1 (Ref) | 1 (Ref) | 1 (Ref) | 1 (Ref) |
| 40-59 | 4.05 (2.43 – 6.75) | 4.05 (2.43 – 6.75) | 1.91 (1.19 – 3.06) | 1.66 (1.08 – 2.55) |
| 60-79 | 7.63 (4.73 – 12.3) | 7.63 (4.73 – 12.3) | 1.83 (1.10 – 3.03) | 1.56 (0.94 – 2.60) |
| 80 and older | 3.03 (1.69 – 5.45) | 3.03 (1.69 – 5.46) | 0.56 (0.29 – 1.09) | 0.53 (0.27 – 1.05) |
| Female (vs male) | 1.38 (1.12 – 1.71) | 1.38 (1.12 – 1.71) | 1.06 (0.83 – 1.36) | 1.04 (0.83 – 1.31) |
| Race/Ethnicity |  |  |  |  |
| Non-Hispanic White | 1 (Ref) | 1 (Ref) | 1 (Ref) | 1 (Ref) |
| Non-Hispanic Black | 0.78 (0.61 – 0.98) | 0.78 (0.61 – 0.99) | 0.82 (0.61 – 1.11) | 0.84 (0.65 – 1.08) |
| Hispanic | 0.60 (0.43 – 0.84) | 0.60 (0.43 – 0.84) | 1.26 (0.85 – 1.88) | 1.32 (0.89 – 1.97) |
| Other race/ethnicity | 1.04 (0.77 – 1.49) | 1.04 (0.77 – 1.40) | 1.65 (1.04 – 2.62) | 1.60 (1.04 – 2.46) |
| Ever sought help for sleeping difficulty (Yes vs no) | 1.73 (1.43 – 2.09) | 1.73 (1.43 – 2.09) | 1.13 (0.89 – 1.44) | 1.13 (0.90 – 1.42) |
| Sleep apnea symptoms (vs None) | 0.99 (0.83 – 1.19) | 0.99 (0.83 – 1.19) | 0.89 (0.73 – 1.09) | 0.92 (0.76 – 1.11) |
| Cardiovascular disease (vs no cardiovascular disease) | 2.51 (1.82 – 3.45) | 2.51 (1.82 – 3.45) | 1.42 (0.97 – 2.10) | 1.37 (0.93– 2.03) |
| Diabetes (vs no diabetes) | 2.19 (1.60 – 2.99) | 2.19 (1.60 – 2.99) | 1.03 (0.72 – 1.48) | 1.08 (0.78 – 1.51) |
| Moderate chronic kidney disease (vs no moderate chronic kidney disease) | 2.40 (1.58 – 3.66) | 2.40 (1.58 – 3.66) | 1.60 (0.98 – 2.60) | 1.62 (1.01 – 2.62) |
| Depressive symptoms |  |  |  |  |
| Minimal or none | 1 (Ref) | 1 (Ref) | 1 (Ref) | 1 (Ref) |
| Mild | 1.24 (0.87 – 1.78) | 1.24 (0.87 – 1.76) | 1.14 (0.78 – 1.67) | 1.16 (0.81 – 1.67) |
| Moderate to severe | 1.46 (0.94 – 2.28) | 1.47 (0.95 – 2.28) | 1.38 (0.73 – 2.61) | 1.40 (0.79 – 2.48) |
| Prescription sleep medication use | 1.46 (1.00 – 2.11) | 1.46 (1.00 – 2.11) | 0.87 (0.52 – 1.47) | 0.84 (0.52 – 1.37) |

***Note****: Estimates weighted using mobile examination center (MEC) sample weights*

a *Adjusted for all covariates in the table plus current use of antihypertensive medications, cigarette smoking, alcohol intake, MET minutes per week, BMI, nativity, health insurance, employment status, healthcare visits in past year, annual household income, and education level*

*Abbreviations: OR, odds ratio; aOR, adjusted odds ratio*

Appendix Table 3

Comparison of results on **odds for BP control in NHANES sample of US adults with hypertension: Adults on antihypertensive medication**

|  | **Crude OR (95% CI)** | | **aOR (95% CI)** a | |
| --- | --- | --- | --- | --- |
|  | **Pre-imputation** | **Post-imputation** | **Pre-imputation** | **Post-imputation** |
| Sleep duration |  |  |  |  |
| 7 - 9 | 1 (Ref) | 1 (Ref) | 1 (Ref) | 1 (Ref) |
| <6 | 0.58 (0.38 – 0.88) | 0.58 (0.38 – 0.88) | 0.52 (0.35– 0.77) | 0.53 (0.36 – 0.77) |
| 6 - <7 | 1.16 (0.71 – 1.87) | 1.16 (0.71 – 1.87) | 1.04 (0.62 – 1.73) | 1.15 (0.70 – 1.88) |
| >9 | 0.84 (0.60 – 1.19) | 0.84 (0.60 – 1.19) | 1.00 (0.69 – 1.47) | 0.95 (0.66 – 1.38) |
| Age |  |  |  |  |
| 18-39 | 1 (Ref) | 1 (Ref) | 1 (Ref) | 1 (Ref) |
| 40-59 | 1.45 (0.87 – 2.42) | 1.45 (0.87 – 2.42) | 1.59 (0.98 – 2.60) | 1.43 (0.89 – 2.30) |
| 60-79 | 1.46 (0.85 – 2.52) | 1.46 (0.85 – 2.52) | 1.51 (0.90 – 2.55) | 1.28 (0.75 – 2.18) |
| 80 and older | 0.52 (0.27 – 1.00) | 0.52 (0.27 – 1.00) | 0.46 (0.24 – 0.86) | 0.43 (0.22 – 0.86) |
| Female (vs male) | 0.97 (0.78 – 1.21) | 0.97 (0.78 – 1.21) | 1.05 (0.79 – 1.39) | 1.05 (0.82 – 1.36) |
| Race/Ethnicity |  |  |  |  |
| Non-Hispanic White | 1 (Ref) | 1 (Ref) | 1 (Ref) |  |
| Non-Hispanic Black | 0.72 (0.56 – 0.92) | 0.72 (0.56 – 0.92) | 0.85 (0.62 – 1.18) | 0.85 (0.65 – 1.12) |
| Hispanic | 0.79 (0.58 – 1.07) | 0.79 (0.58 – 1.07) | 1.26 (0.84 – 1.89) | 1.32 (0.88 – 1.96) |
| Other race/ethnicity | 1.23 (0.87 – 1.73) | 1.23 (0.87 – 1.73) | 1.72 (1.14 – 2.60) | 1.70 (1.17 – 2.47) |
| Ever sought help for sleeping difficulty (Yes vs no) | 1.24 (1.00 – 1.54) | 1.24 (1.00 – 1.54) | 1.11 (0.88 – 1.41) | 1.13 (0.91 – 1.41) |
| Sleep apnea symptoms (vs None) | 0.99 (0.80 – 1.24) | 0.99 (0.80 – 1.24) | 0.88 (0.71 – 1.09) | 0.89 (0.72 – 1.11) |
| Cardiovascular disease (vs no cardiovascular disease) | 1.17 (0.85 – 1.61) | 1.17 (0.85 – 1.61) | 1.38 (0.97 – 1.97) | 1.31 (0.93 – 1.84) |
| Diabetes (vs no diabetes) | 1.07 (0.76 – 1.51) | 1.07 (0.76 – 1.51) | 0.99 (0.69 – 1.42) | 1.02 (0.73 – 1.43) |
| Moderate chronic kidney disease (vs no moderate chronic kidney disease) | 1.25 (0.77 – 2.03) | 1.25 (0.77 – 2.03) | 1.58 (0.95 – 2.62) | 1.58 (0.98 – 2.54) |
| Depressive symptoms |  |  |  |  |
| Minimal or none |  | 1 (Ref) | 1 (Ref) | 1 (Ref) |
| Mild | 1.06 (0.72 – 1.56) | 1.06 (0.73 – 1.56) | 1.16 (0.77 – 1.73) | 1.16 (0.79 – 1.71) |
| Moderate to severe | 1.10 (0.69 – 1.75) | 1.09 (0.69 – 1.73) | 1.31 (0.78 – 2.20) | 1.28 (0.79 – 2.08) |
| Prescription sleep medication use | 0.91 (0.60 – 1.36) | 0.91 (0.60 – 1.37) | 0.83 (0.53 – 1.30) | 0.81 (0.54 – 1.24) |

***Note****: Estimates weighted using mobile examination center (MEC) sample weights*

a *Adjusted for all covariates in the table plus types and number of antihypertensive medications one is currently on, cigarette smoking, alcohol intake, MET minutes per week, BMI, nativity, health insurance, employment status, healthcare visits in past year, annual household income, and education level*

*Abbreviations: OR, odd ratio; aOR, adjusted odds ratio*
